# Supplementary material
Source: publisher site journal article supplement (http://www.kjim.org/upload/media/kjim-2022-050-suppl3.pdf)
Supplement: Supplementary file 1 [file kjim-2022-050-suppl3.pdf]

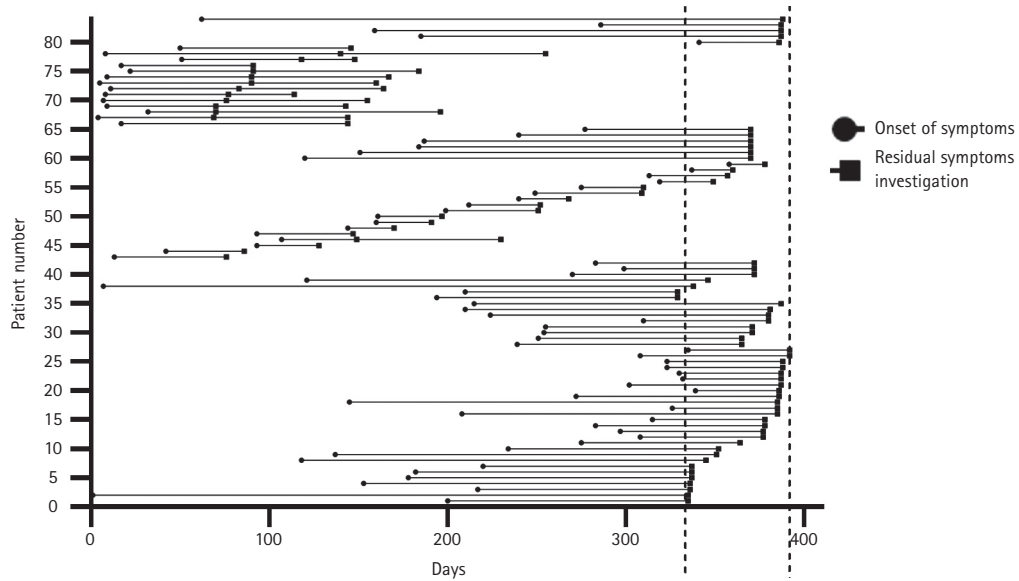

**Supplementary Figure 1.** Timing of residual symptom investigations of 84 patients who had been hospitalized for coronavirus disease 2019 (COVID-19) and visited the follow-up outpatient clinic after recovery from COVID-19. The period between the two vertical dotted lines indicates the study period. The time of symptoms onset was marked with a black circle. The time of residual symptom investigation was marked with a black rectangle.
